# Supplementary material
Source: Springer Nature journal article supplement (https://www.springermedizin.de/resource/supplementary/12884_2012_782_MOESM1_ESM.pdf/9458186)
Supplement: MOESM1 [file 9458186]

Additional Figure 1: Spatial Distributions of (a) Percent Poverty and (b) Percent African American Quartiles Across Alabama

**A**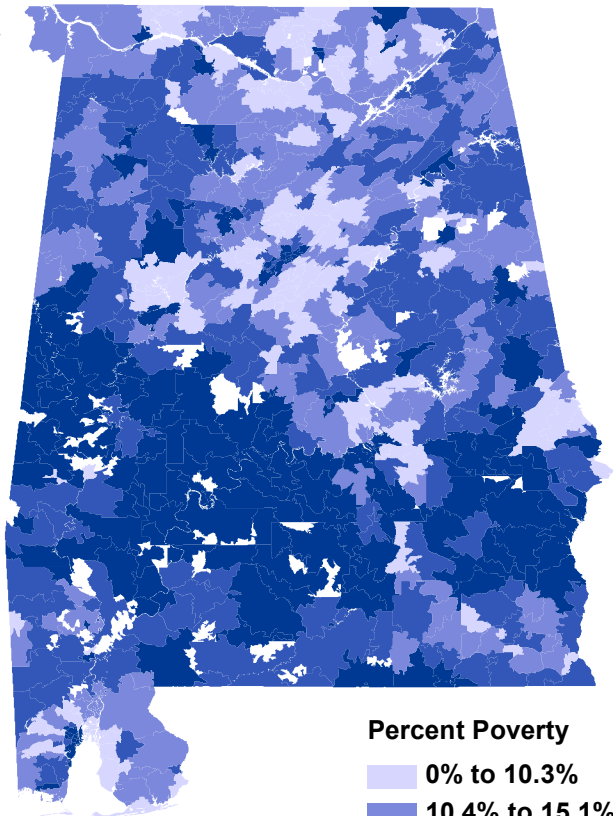**Percent Poverty**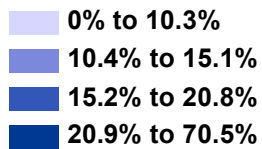**B**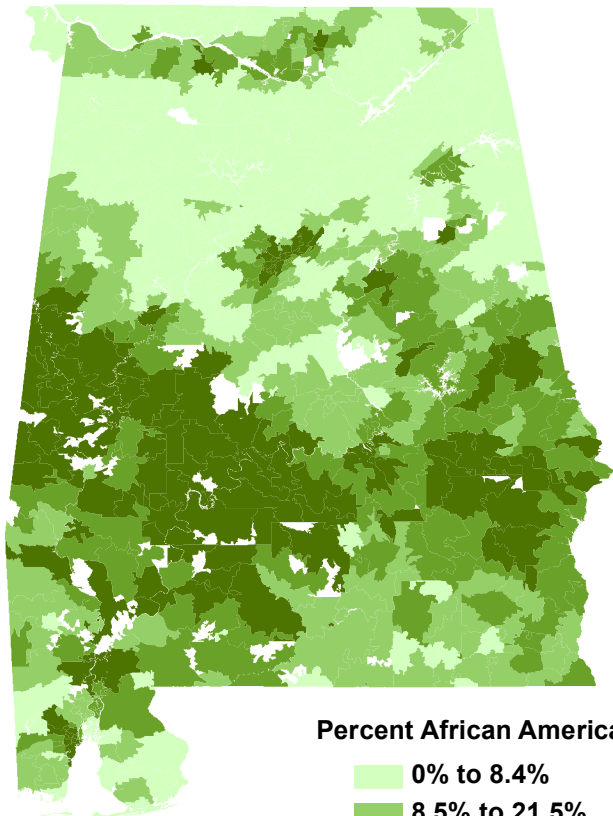**Percent African American**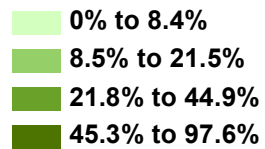

Additional Figure 2: Spatial Distributions of (a) Preterm Birth and (b) Low Birth Weight Rates  
Across Alabama

**A**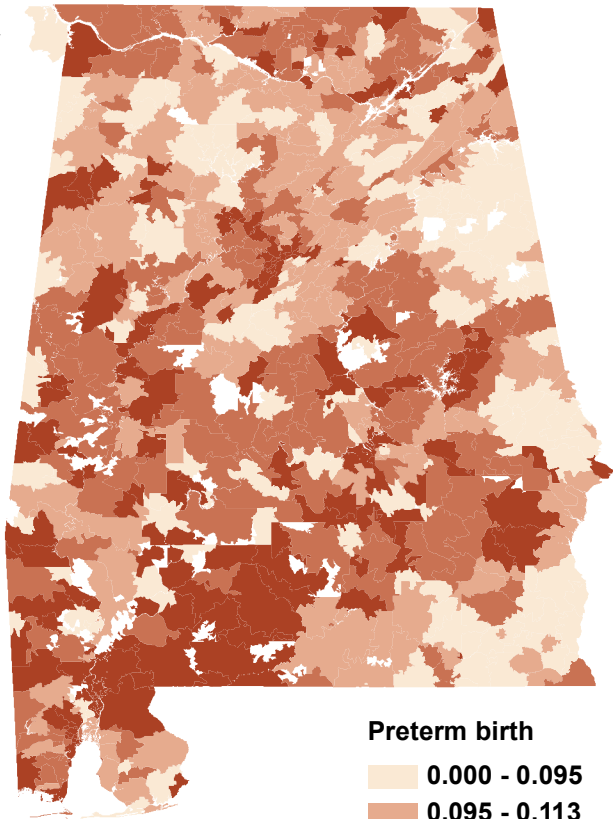**Preterm birth** 0.000 - 0.095 0.095 - 0.113 0.113 - 0.132 0.132 - 0.250**B**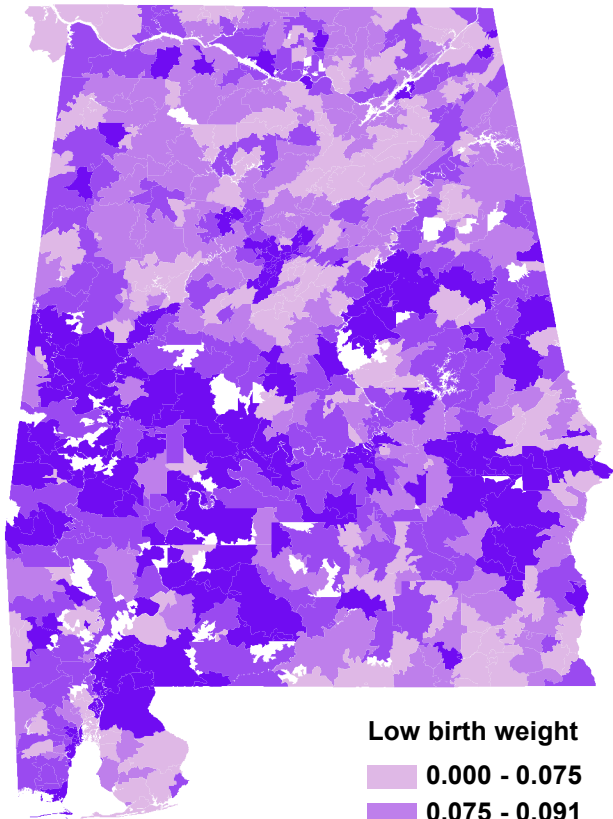**Low birth weight** 0.000 - 0.075 0.075 - 0.091 0.091 - 0.111 0.111 - 0.667
